# Supplementary material
Source: publisher figshare collection journal article supplement (https://diabetesjournals.figshare.com/articles/dataset/_/24932829)
Supplement: Supplementary file 1 [file 1]

## Appendix 2 - Standardized electronic health record-based phrases

### CGM Data Review Phrase:

@FNAME@ has an average blood glucose of \*\*\* and is in target range (70-180) \*\*\*% of the time with \*\*\*% lows.

Our goal is to get people into target range more than 70% (16 hours 48 min/day) of the time with less than 4% lows (58 min/day). \*\*\*

Please let us know if you have questions or concerns. We will review trends again next {diabreviewsweekmonth:27818}. You can also view the trends if you log into clarity on your computer and look at the overall trends and average blood glucose.

@ME@

### Not Wearing Dexcom:

I see where @FNAME@ is not wearing @his@ dexcom. Are you taking a break, swiping out of the app or are you struggling to get the needed supplies? If you are struggling with supplies we can assist you. If you have swiped out of the app please log back in. If you are taking a break do not forget to check @his@ BG in the middle of the night when you change the long acting insulin or if @he@ has an unusually active day.

Let us know how we can assist you.

@me@
