# Supplementary material
Source: publisher figshare collection journal article supplement (https://diabetesjournals.figshare.com/articles/dataset/_/24932829)
Supplement: Supplementary file 2 [file 1]

## Appendix 1 - Historic New Onset T1D Care vs. 4T Pilot Study

### Historic New Onset T1D Care

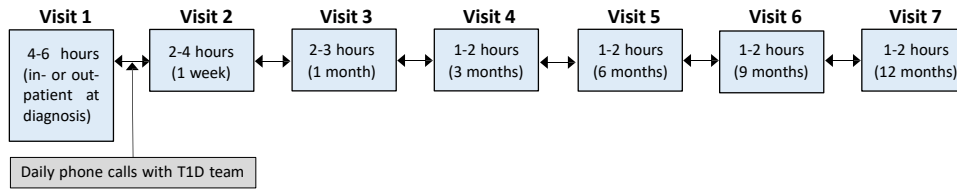

### 4T Pilot Study Timeline

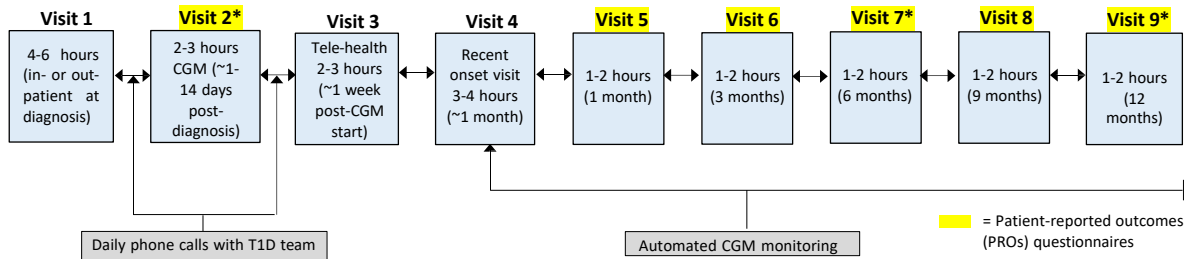

Stanford University
